# Supplementary material for: CD73 and PD-L1 as Potential Therapeutic Targets in Gallbladder Cancer
Source: MDPI journal article supplement (doi:10.3390/ijms23031565), 2022-01-29
Supplement: s1 [file s1]

**Table S1.** List of primers for RT-qPCR

| Gene Name | Forward Sequence (5'-3')                         | Reverse Sequence (5'-3')    |
|-----------|--------------------------------------------------|-----------------------------|
| ABCG2     | GTTCTCAGCAGCTCTTCGGC<br>TT                       | TCCTCCAGACACACCACGG<br>ATA  |
| CD73      | AGTCCACTGGAGAGTTCCTG<br>CA                       | TGAGAGGGTCATAACTGGG<br>CAC  |
| VISTA     | AGATGCACCATCCAACCTGTGAGGCAGAGGATTCCTACGAT<br>TGG | GC                          |
| HVEM      | TTCTCTCAGGGAGCCTCGTC<br>AT                       | CTCACCTTCTGCCTCCTGTCT<br>T  |
| PD1       | GGTGACAGAGAGAAGGGCA<br>G                         | GTCCTCCTTCAGGGGCTGG         |
| TIGIT     | TGGTGGTCATCTGCACAGCA<br>GT                       | TTTCTCCTGAGGTCACCTTCC<br>AC |
| TIM3      | CTACTGCTGCCGATCCAAA                              | GTCCCCTGGTGGTAAGCATC        |

**Table S2.** List of antibodies used for western blot.

| Antibodies     | Cat. No.  | Manufacturer   | Antibody Category | Dilution  |
|----------------|-----------|----------------|-------------------|-----------|
| CD44           | ab157107  | Abcam          | Primary           | 1:10000   |
| $\beta$ -actin | 4967s     | Cell signaling | Primary           | 1:4000    |
| CD24           | PA5-86955 | Thermofisher   | Primary           | 1:500     |
| ALDH1A1        | sc-374194 | Santa Cruz     | Primary           | 1:500     |
| E-CAD          | ab76055   | Abcam          | Primary           | 1:1000    |
| N-CAD          | sc-53488  | Santa Cruz     | Primary           | 1:500     |
| OCCLUDIN       | sc-133255 | Santa Cruz     | Primary           | 1:200     |
| FIBRONECTIN    | sc-8422   | Santa Cruz     | Primary           | 1:200     |
| ZEB1           | sc-25388  | Santa Cruz     | Primary           | 1:250     |
| VIMENTIN       | ab92547   | Abcam          | Primary           | 1:2000    |
| SLUG           | sc-166902 | Santa Cruz     | Primary           | 1:200     |
| PDL1           | ab238697  | Abcam          | Primary           | 1:1000    |
| GALECTIN9      | ab227046  | Abcam          | Primary           | 1:1000    |
| TIM3           | ab241332  | Abcam          | Primary           | 1:1000    |
| GAPDH          | MAB376    | Millipore      | Primary           | 1:100,000 |

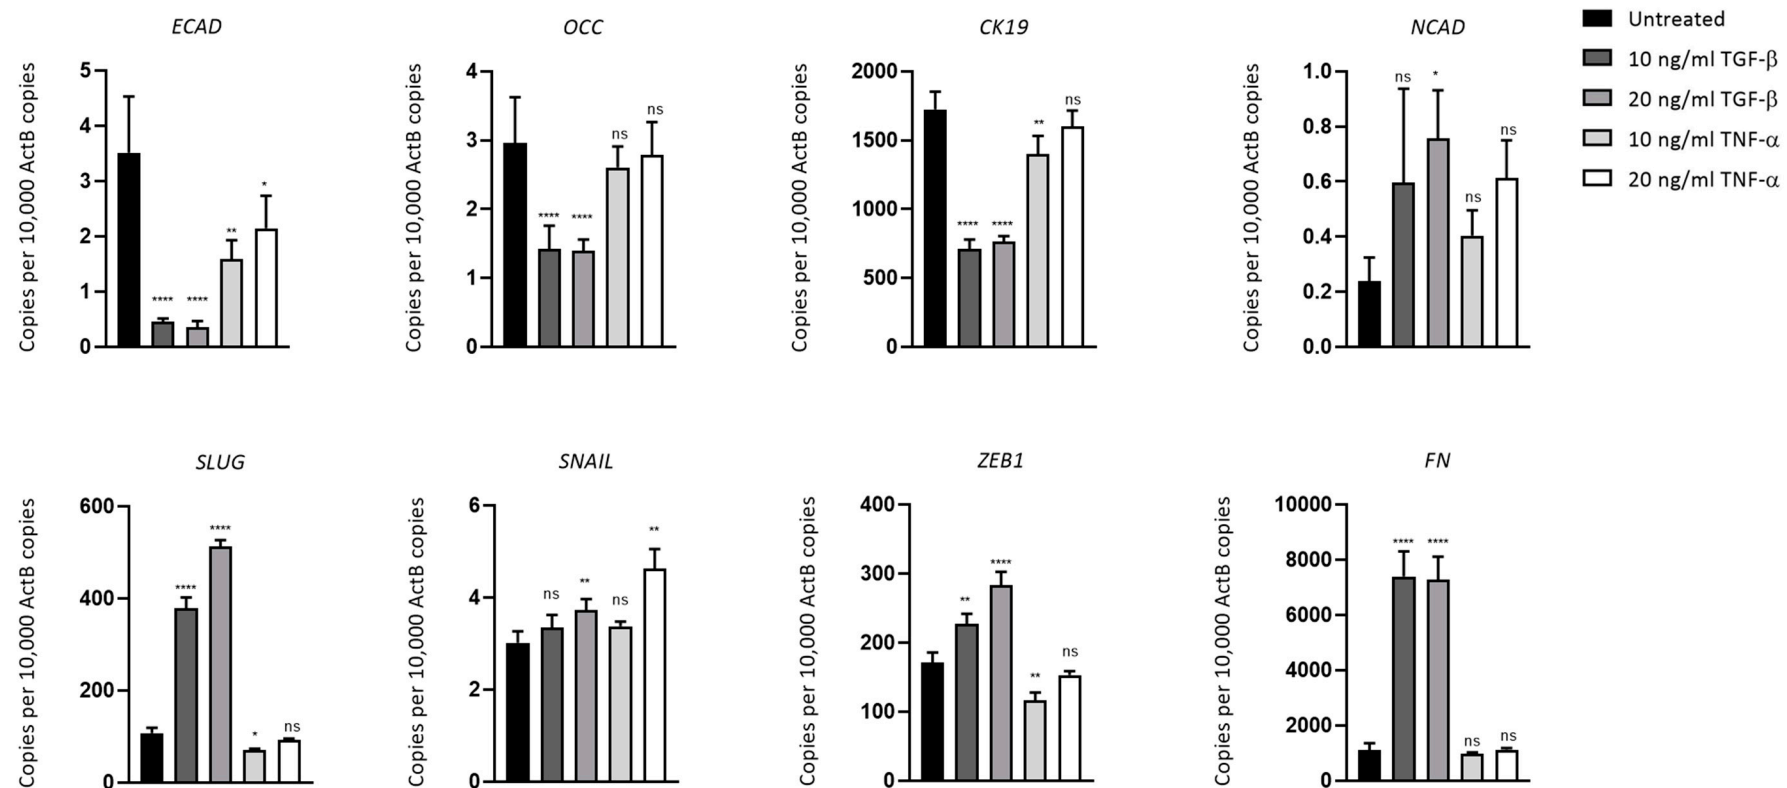

**Figure S1.** Incubation with TGF- $\beta$ 1 or TNF- $\alpha$  for 96 hrs induced EMT to varied extend in NOZ cells. ns not significant, \* $P < 0.05$ , \*\* $P < 0.01$ , \*\*\* $P < 0.001$ .

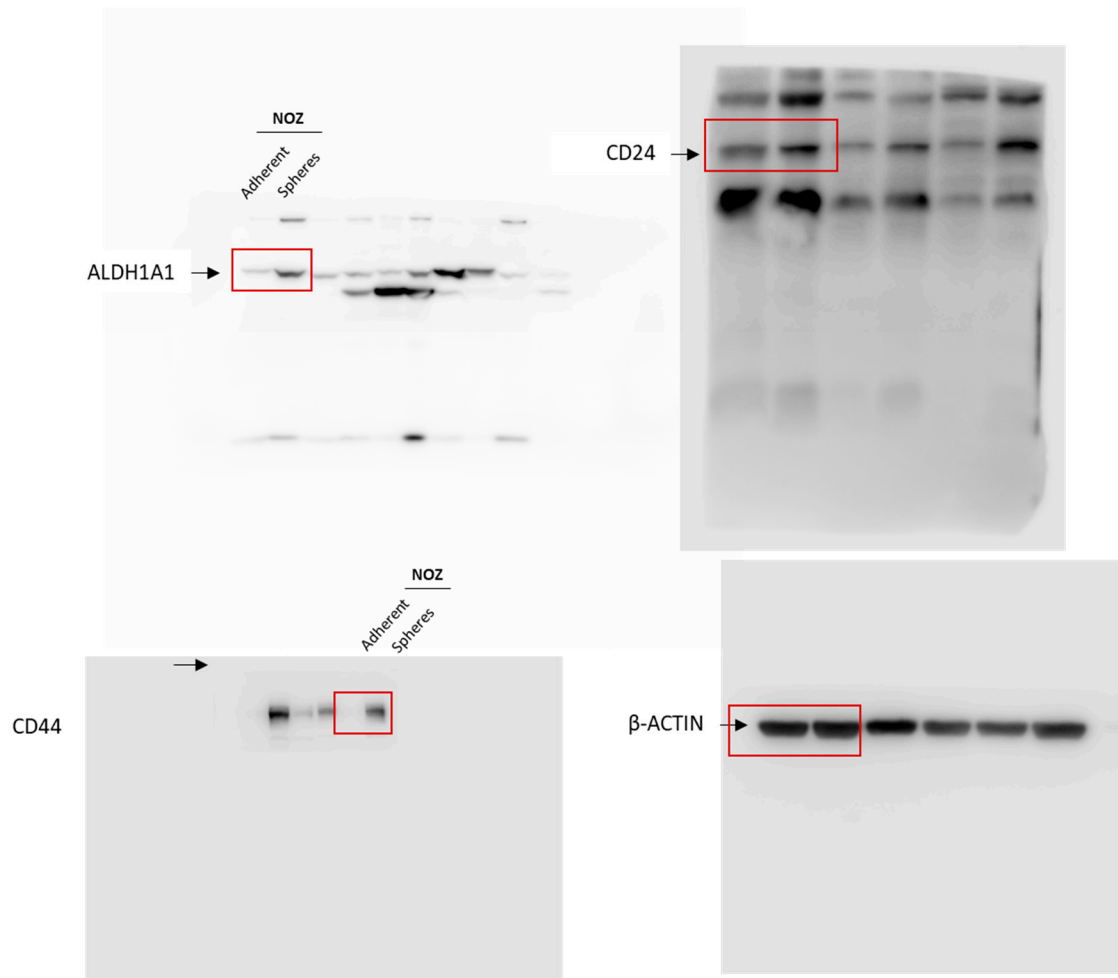

**Figure S2.** Original western blots from figure 1C.

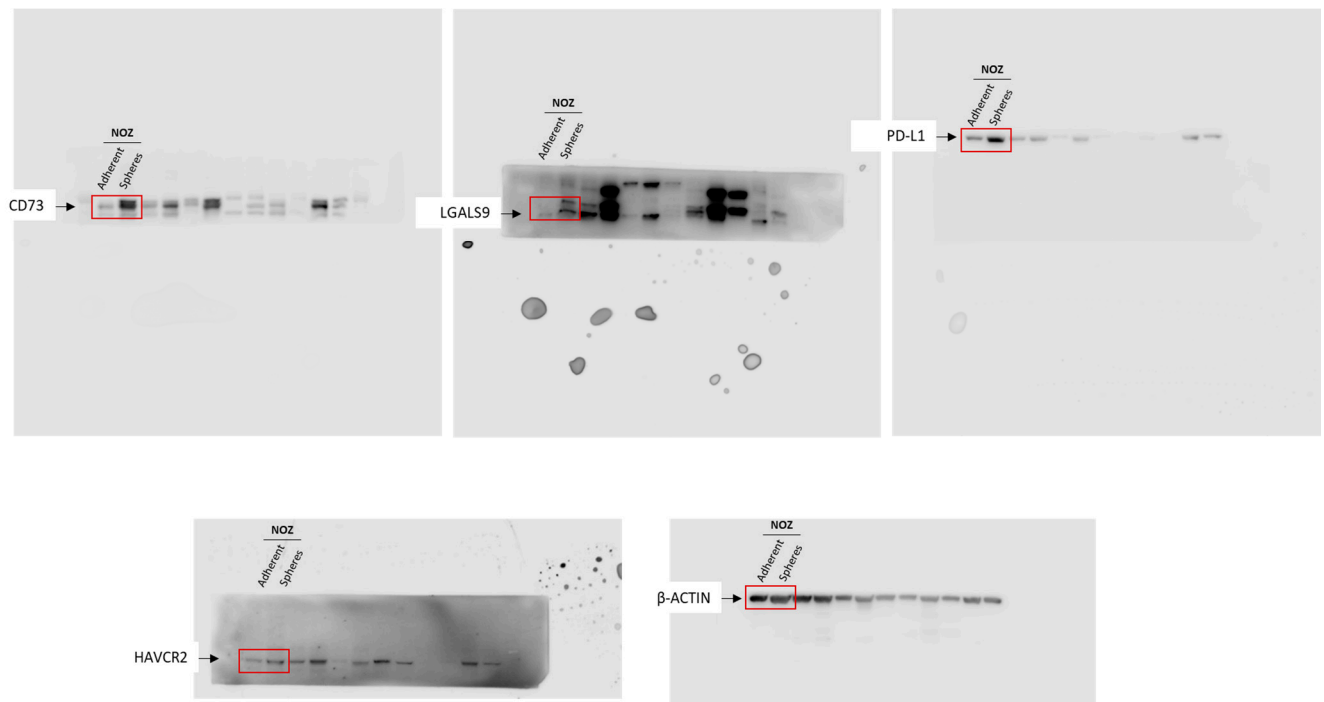

**Figure S3.** Original western blots from figure 2B.

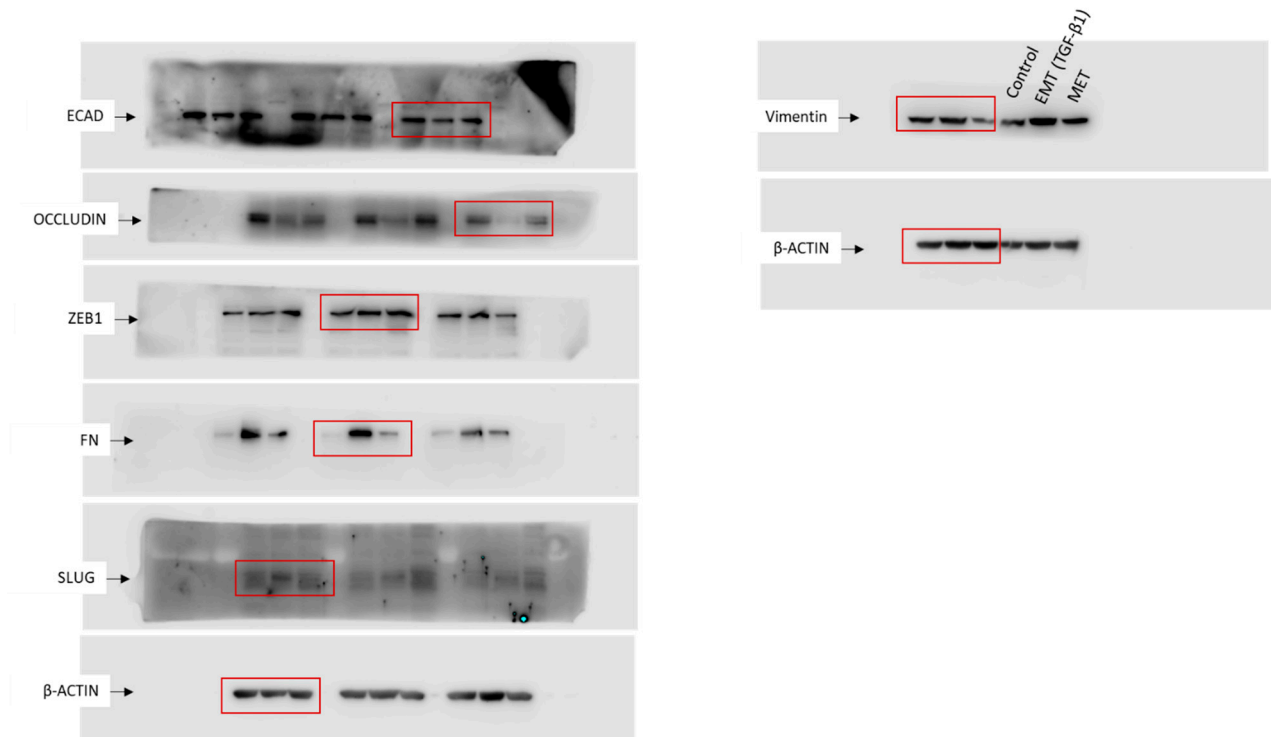

**Figure S4.** Original western blots from figure 4B.

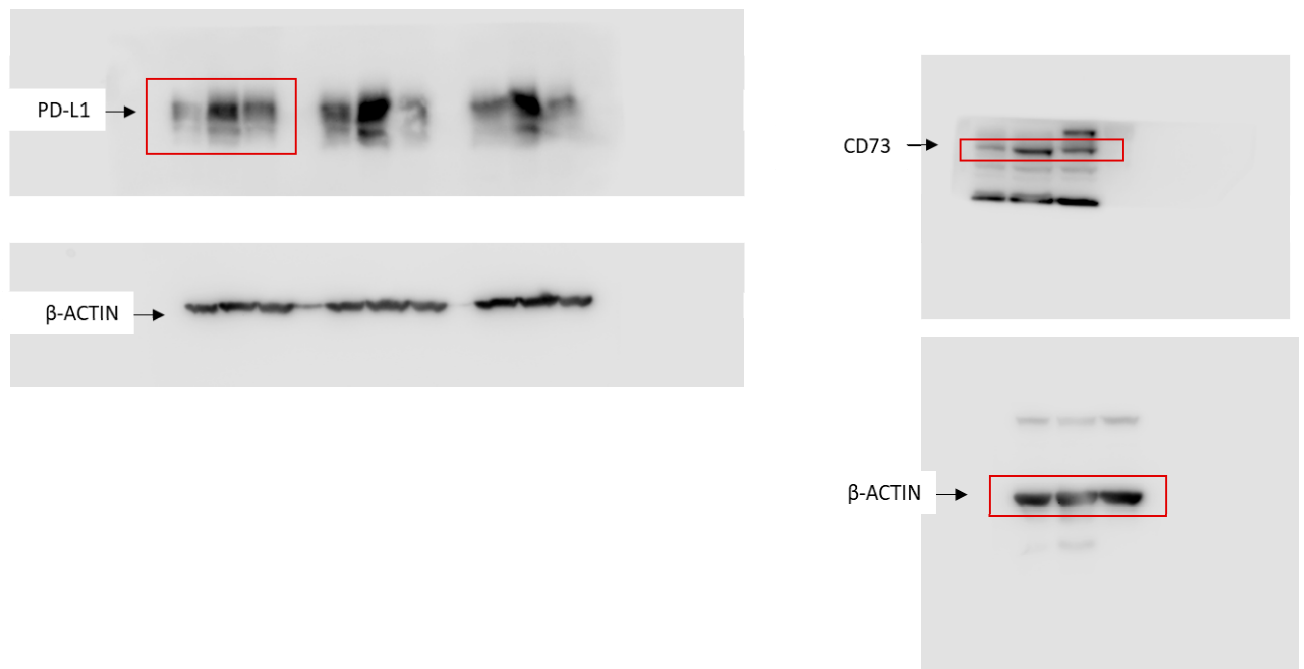

**Figure S5.** Original western blots from figure 5B.

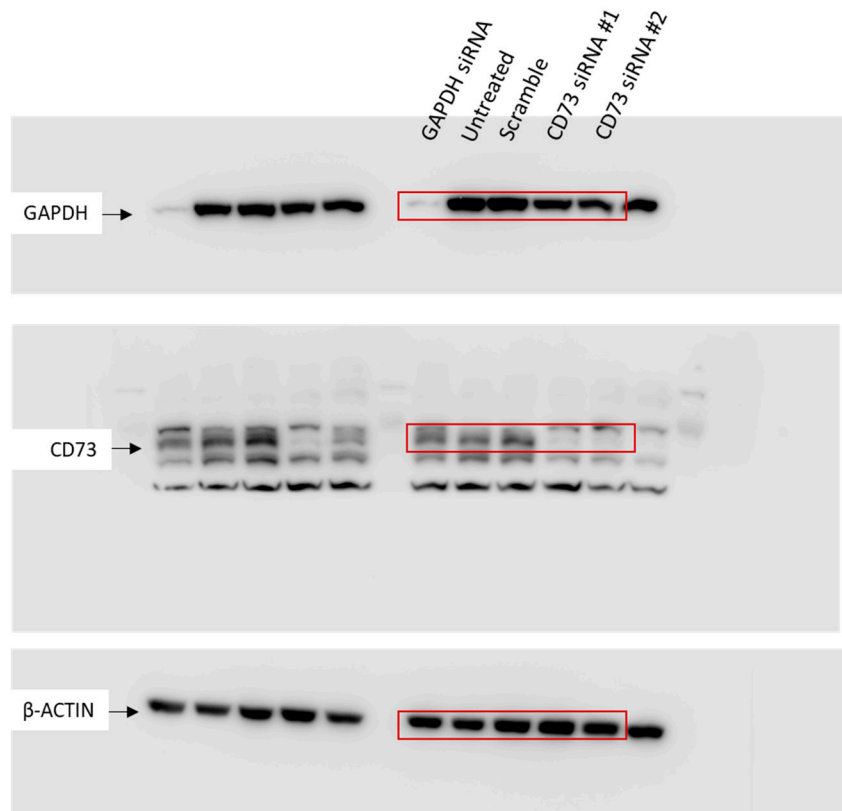

**Figure S6.** Original western blots from figure 6B.

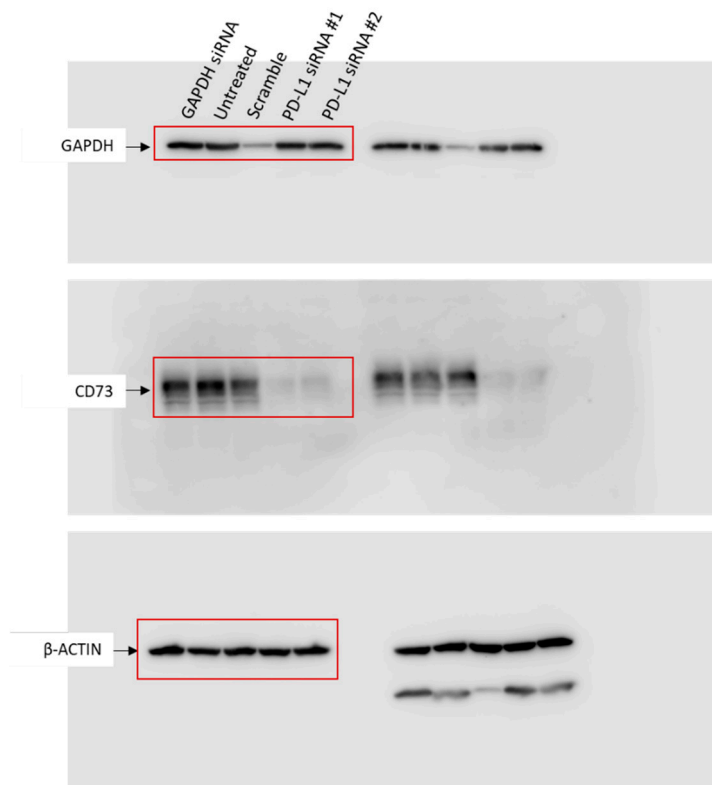

**Figure S7.** Original western blots from figure 6D.
